# Supplementary material for: Comparative Study of Secreted Proteins, Enzymatic Activities of Wood Degradation and Stilbene Metabolization in Grapevine Botryosphaeria Dieback Fungi
Source: MDPI journal article supplement (doi:10.3390/jof7070568), 2021-07-16
Supplement: s1 [file s1]

*Supplementary Material*

# Comparative Study of Secreted Proteins, Enzymatic Activities of Wood Degradation and Stilbene Metabolization in Grapevine *Botryosphaeria Dieback* Fungi

Clément Labois <sup>1,2</sup>, Elodie Stempien <sup>1,†</sup>, Justine Schneider <sup>3,‡</sup>, Christine Schaeffer-Reiss <sup>3</sup>, Christophe Bertsch <sup>1</sup>, Mary-Lorène Goddard <sup>1,2,\*</sup> and Julie Chong <sup>1,\*</sup>

<sup>1</sup> Laboratoire Vigne, Biotechnologies et Environnement (LVBE, UPR 3991), Université de Haute Alsace, 68000 Colmar, France; clement.labois@uha.fr (C.L.); elodie.stempien@gmail.com (E.S.); christophe.bertsch@uha.fr (C.B.)

<sup>2</sup> Laboratoire d'Innovation Moléculaire et Applications, Université de Haute-Alsace, Université de Strasbourg, CNRS, LIMA, UMR 7042, CEDEX, 68093 Mulhouse, France

<sup>3</sup> Laboratoire de Spectrométrie de Masse BioOrganique (LSMBO), IPHC, Université de Strasbourg, CNRS, UMR7178, 25 Rue Becquerel, 67087 Strasbourg, France; j.schneider@inoviem.com (J.S.); christine.schaeffer@unistra.fr (C.S.-R.)

\* Correspondence: mary-lorene.goddard@uha.fr (M.-L.G.); julie.chong@uha.fr (J.C.); Tel.: +33-3-89-33-67-69 (M.-L.G.)

<sup>†</sup> Present Address: Department of Plant Pathology, University of Stellenbosch, Private Bag X1, Matieland, 7602, South Africa.

<sup>‡</sup> Present Address: Inoviem Scientific, 850 Boulevard Sébastien Brand, 67400 Illkirch-Graffenstaden, France.

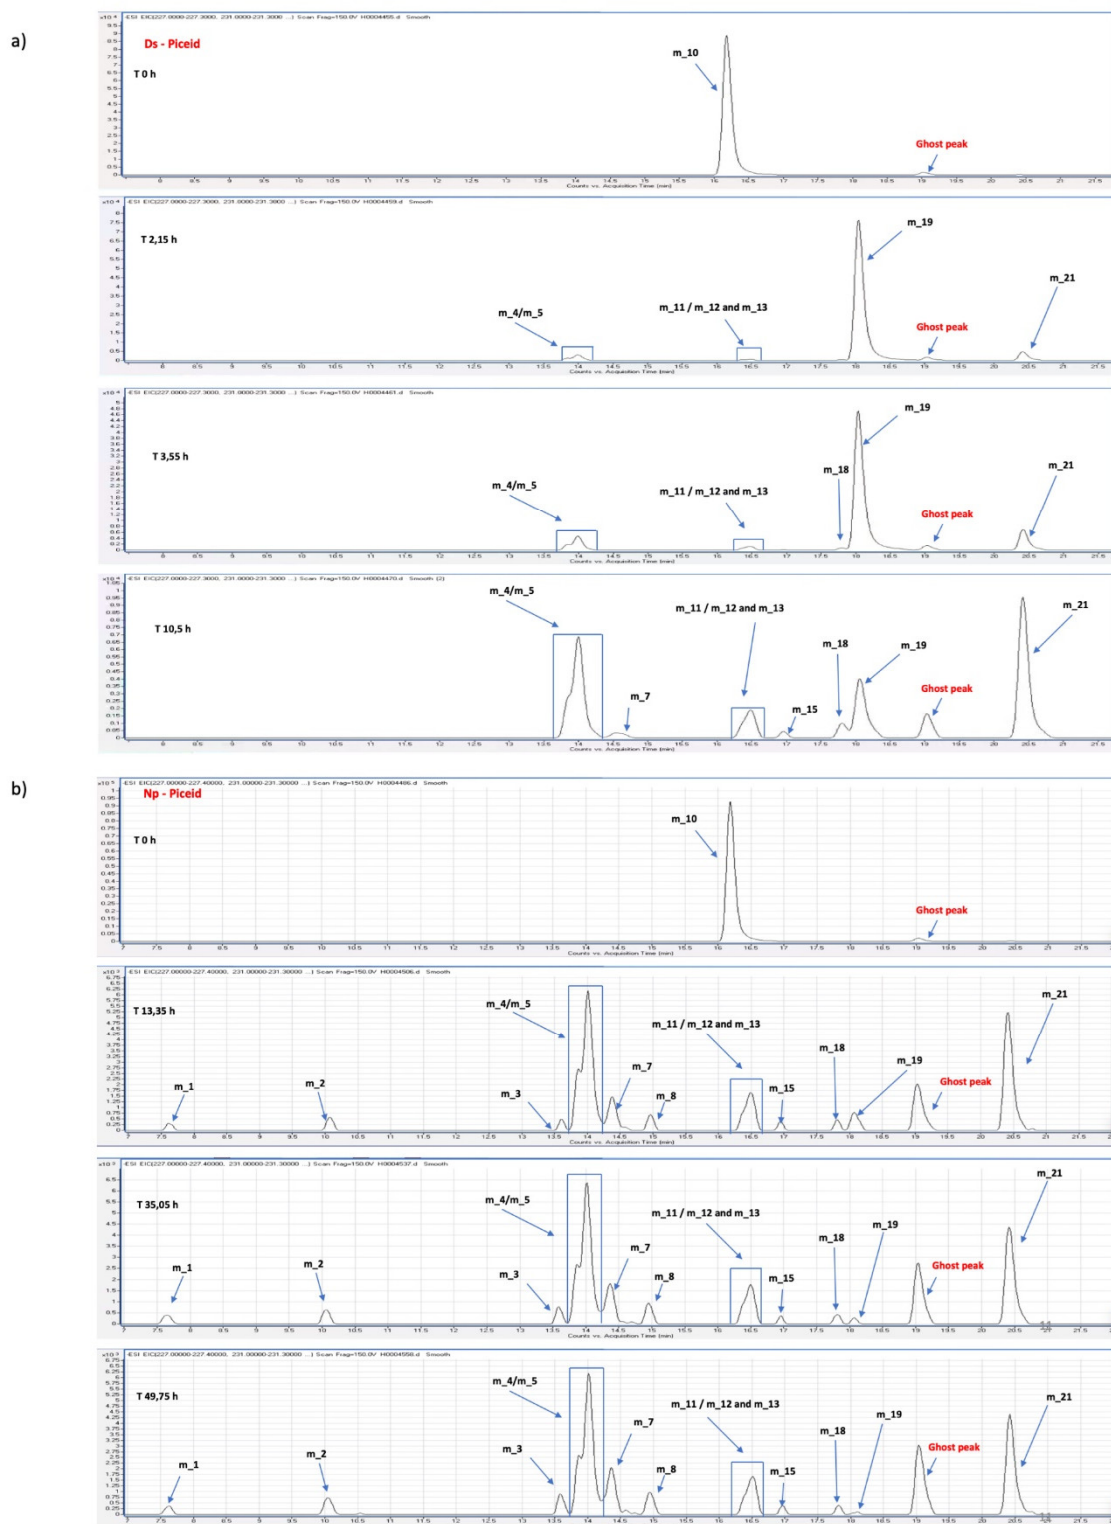

**Figure S1.** Extract Ion Chromatograms (EIC) obtained from piceld metabolization by (a) *D. seriata* and (b) *N. parvum* extracellular proteins at different time points.

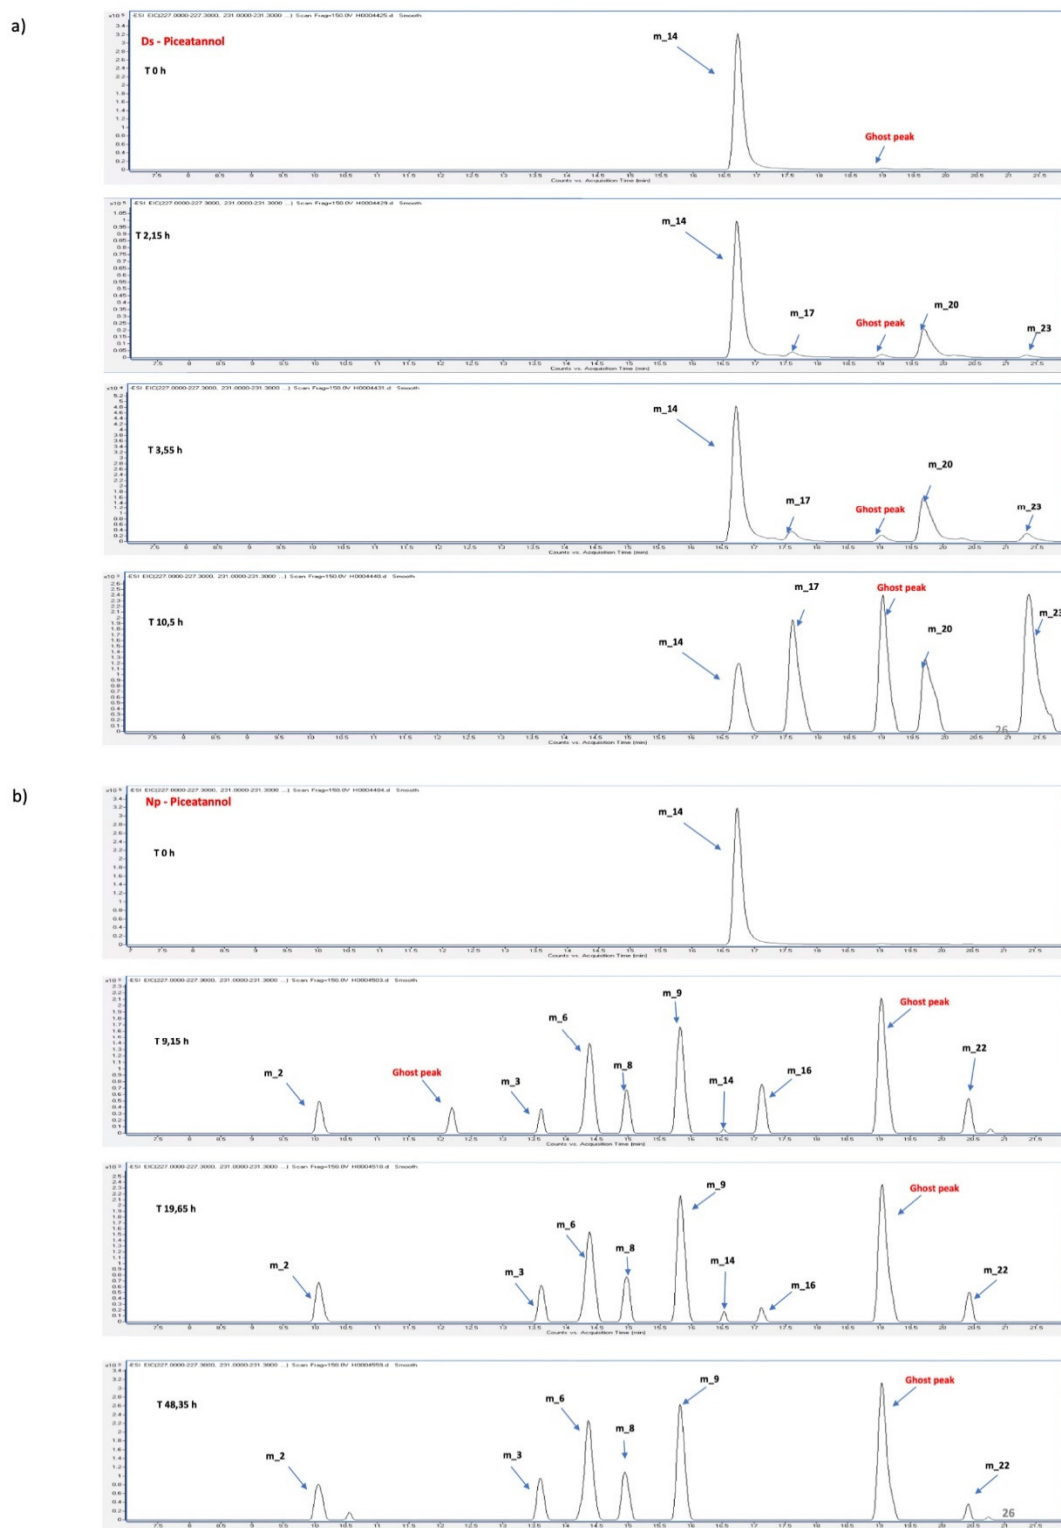

**Figure S2.** Extract Ion Chromatograms (EIC) obtained from piceatannol metabolization by (a) *D. seriata* and (b) *N. parvum* extracellular proteins at different time points.

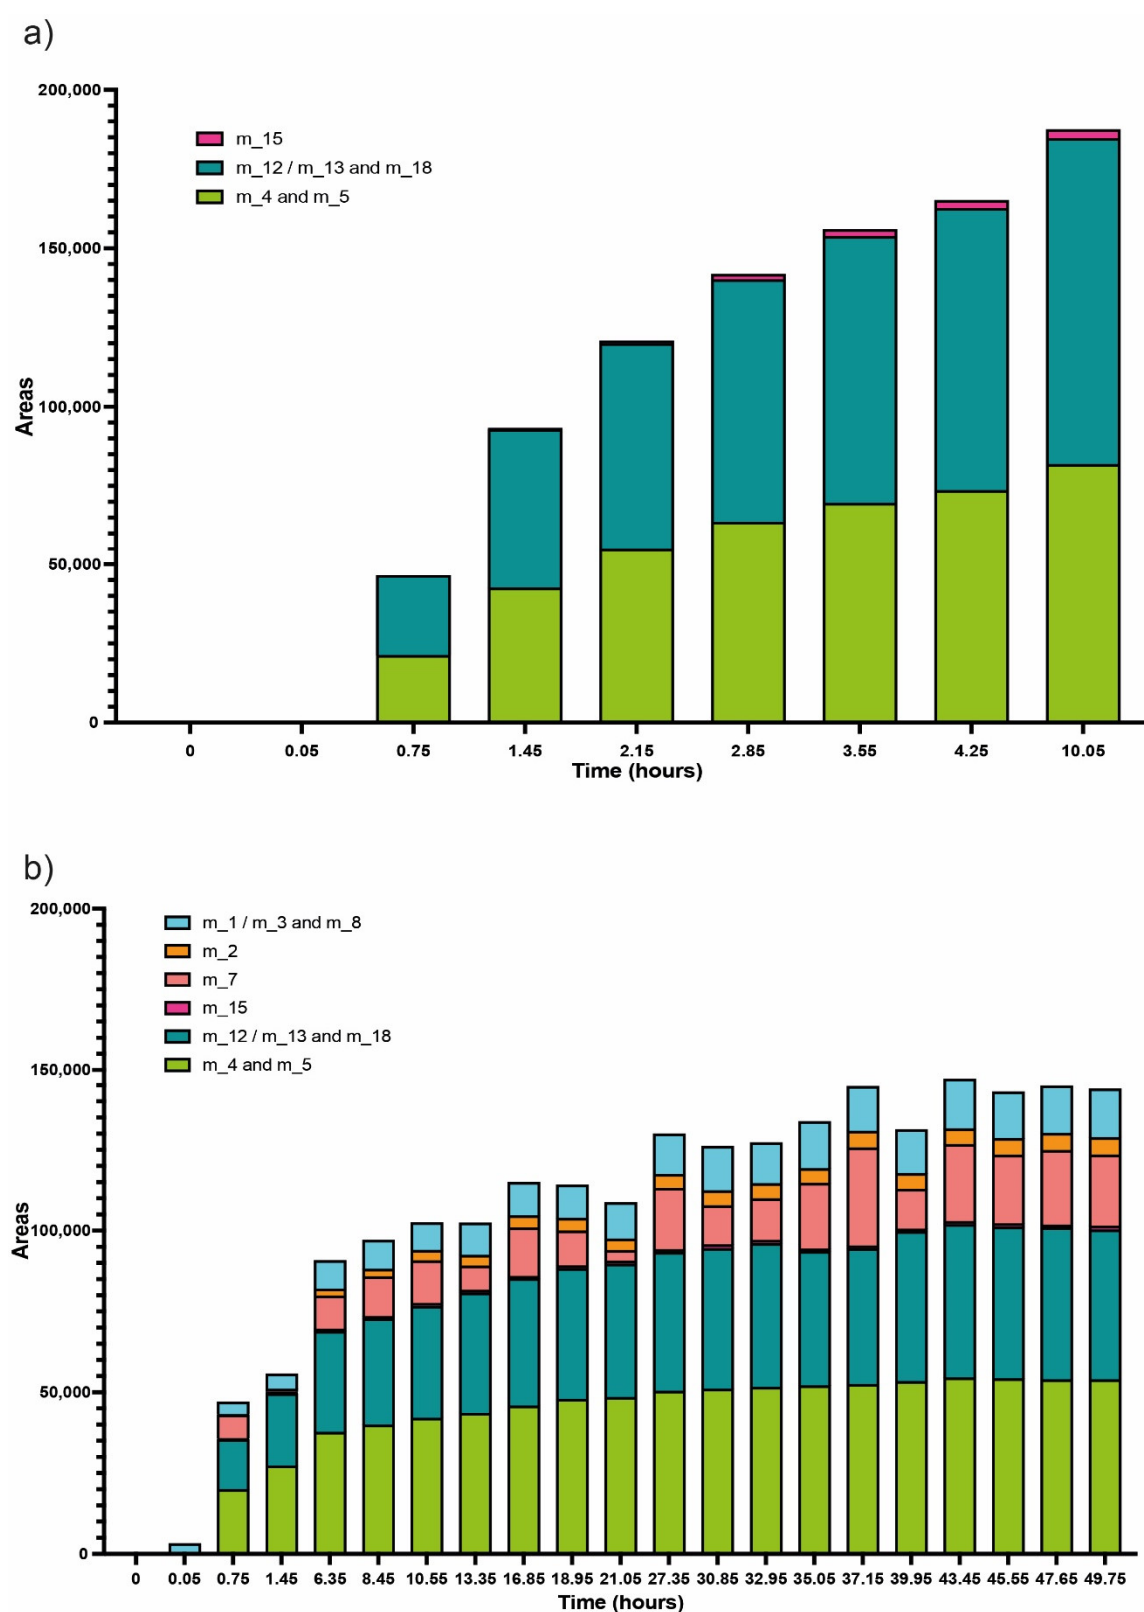

**Figure S3.** Putative metabolization products obtained during kinetic monitoring of trans-piceid (5 µg/mL) metabolization in sodium acetate buffer by total extracellular protein extract from (a) *D. seriata* (200 µg/mL) and (b) *N. parvum* (1 mg/mL). Mean was calculated over three biological replicates each comprising two technical replicates ( $n = 6$ ).

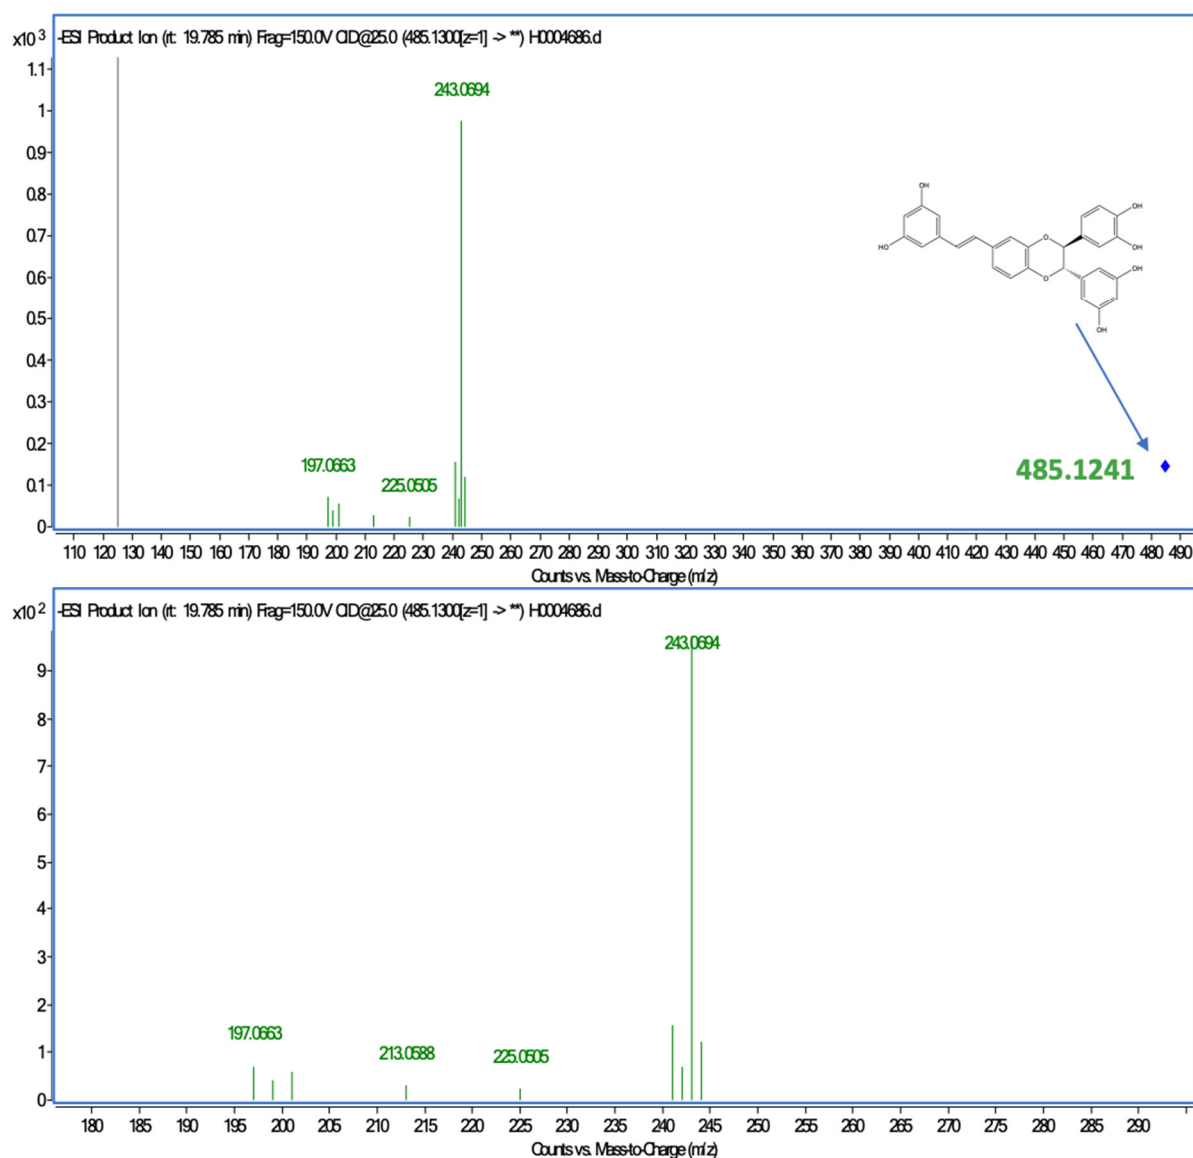

**Figure S4.** MS-MS spectrum for putative identification of Cassigarol E with Mass Hunter (Agilent Technologies, Santa Clara, CA, USA).

**Table S1.** List of *N. parvum* secreted proteins according to the culture medium.

| Entry Name   | Gene Name   | Identified in<br><i>N. parvum</i><br>Malt | Identified in <i>N.</i><br><i>parvum</i> Malt+Wood | Molecular Weight | Enzyme Class |
|--------------|-------------|-------------------------------------------|----------------------------------------------------|------------------|--------------|
| R1H3P0_BOTPV | UCRNP2_156  | Yes                                       | Yes                                                | 36908            | Hydrolase    |
| R1H3B2_BOTPV | UCRNP2_282  | Yes                                       | Yes                                                | 100513           | Hydrolase    |
| R1H2Y1_BOTPV | UCRNP2_405  | Yes                                       | Yes                                                | 49829            | Hydrolase    |
| R1H1X1_BOTPV | UCRNP2_795  | Yes                                       | Yes                                                | 110578           | Hydrolase    |
| R1H0S9_BOTPV | UCRNP2_1147 | Yes                                       | Yes                                                | 74639            | Hydrolase    |
| R1H0M7_BOTPV | UCRNP2_1242 | Yes                                       | Yes                                                | 42532            | Hydrolase    |
| R1GZU2_BOTPV | UCRNP2_1593 | Yes                                       | Yes                                                | 33329            | Hydrolase    |
| R1GZQ9_BOTPV | UCRNP2_1648 | Yes                                       | Yes                                                | 39323            | Hydrolase    |
| R1GZN3_BOTPV | UCRNP2_1674 | Yes                                       | Yes                                                | 48044            | Hydrolase    |
| R1GXI5_BOTPV | UCRNP2_2427 | Yes                                       | Yes                                                | 37825            | Hydrolase    |
| R1GWK1_BOTPV | UCRNP2_2762 | Yes                                       | Yes                                                | 79702            | Hydrolase    |

|              |                  |     |     |       |           |
|--------------|------------------|-----|-----|-------|-----------|
| R1GVI3_BOTPV | UCRNP2_3149      | Yes | Yes | 57551 | Hydrolase |
| R1GUX3_BOTPV | UCRNP2_1073      | Yes | Yes | 61964 | Hydrolase |
| R1GUW7_BOTPV | UCRNP2_3286      | Yes | Yes | 43262 | Hydrolase |
| R1GTC8_BOTPV | UCRNP2_3892      | Yes | Yes | 64829 | Hydrolase |
| R1GT23_BOTPV | UCRNP2_4011      | Yes | Yes | 57761 | Hydrolase |
| R1GSR4_BOTPV | UCRNP2_1891      | Yes | Yes | 36394 | Hydrolase |
| R1GSK1_BOTPV | UCRNP2_1980      | Yes | Yes | 61094 | Hydrolase |
| R1GS00_BOTPV | UCRNP2_2220      | Yes | Yes | 75439 | Hydrolase |
| R1GRI8_BOTPV | UCRNP2_2356      | Yes | Yes | 36453 | Hydrolase |
| R1GRI6_BOTPV | UCRNP2_4663      | Yes | Yes | 61499 | Hydrolase |
| R1GQ85_BOTPV | UCRNP2_2804      | No  | Yes | 51011 | Hydrolase |
| R1GPX5_BOTPV | UCRNP2_2898      | Yes | Yes | 27087 | Hydrolase |
| R1GPT3_BOTPV | UCRNP2_2931      | Yes | Yes | 91543 | Hydrolase |
| R1GPA2_BOTPV | UCRNP2_5425      | Yes | Yes | 56053 | Hydrolase |
| R1GP89_BOTPV | UCRNP2_5424      | Yes | Yes | 47449 | Hydrolase |
| R1GNJ6_BOTPV | UCRNP2_3307      | Yes | Yes | 60383 | Hydrolase |
| R1GMR9_BOTPV | UCRNP2_5948      | Yes | Yes | 46108 | Hydrolase |
| R1GMR8_BOTPV | UCRNP2_3675      | Yes | Yes | 86835 | Hydrolase |
| R1GM42_BOTPV | UCRNP2_6229      | Yes | Yes | 41788 | Hydrolase |
| R1GLG1_BOTPV | UCRNP2_691       | Yes | Yes | 68532 | Hydrolase |
| R1GK17_BOTPV | UCRNP2_1096      | Yes | Yes | 42117 | Hydrolase |
| R1GJH9_BOTPV | UCRNP2_7128      | Yes | Yes | 25771 | Hydrolase |
| R1GIR6_BOTPV | UCRNP2_7424      | Yes | Yes | 55869 | Hydrolase |
| R1GIC9_BOTPV | UCRNP2_5210      | Yes | Yes | 46266 | Hydrolase |
| R1GHS1_BOTPV | UCRNP2_1987      | Yes | Yes | 44649 | Hydrolase |
| R1GHM7_BOTPV | UCRNP2_2062      | Yes | Yes | 41869 | Hydrolase |
| R1GHF4_BOTPV | UCRNP2_2168      | Yes | Yes | 56748 | Hydrolase |
| R1GGZ6_BOTPV | UCRNP2_8019      | Yes | Yes | 40494 | Hydrolase |
| R1GGQ9_BOTPV | UCRNP2_8156      | Yes | Yes | 38051 | Hydrolase |
| R1GGK2_BOTPV | UCRNP2_5863      | Yes | Yes | 83544 | Hydrolase |
| R1GFF8_BOTPV | UCRNP2_6288      | Yes | Yes | 65834 | Hydrolase |
| R1GF72_BOTPV | UCRNP2_8712      | Yes | Yes | 75040 | Hydrolase |
| R1GF60_BOTPV | UCRNP2_8732      | Yes | Yes | 52147 | Hydrolase |
| R1GEY0_BOTPV | UCRNP2_3078      | Yes | Yes | 77417 | Hydrolase |
| R1GET5_BOTPV | UCRNP2_6495      | Yes | Yes | 47228 | Hydrolase |
| R1GEP3_BOTPV | UCRNP2_6533      | Yes | Yes | 51789 | Hydrolase |
| R1GE12_BOTPV | UCRNP2_3376      | Yes | Yes | 31910 | Hydrolase |
| R1GDJ0_BOTPV | UCRNP2_6952      | Yes | Yes | 37646 | Hydrolase |
| R1GDD4_BOTPV | UCRNP2_3654      | No  | Yes | 60065 | Hydrolase |
| R1GD62_BOTPV | UCRNP2_3810      | No  | Yes | 32071 | Hydrolase |
| R1GD52_BOTPV | UCRNP2_9440      | Yes | Yes | 43378 | Hydrolase |
| R1GCR8_BOTPV | UCRNP2_7276      | Yes | Yes | 98101 | Hydrolase |
| R1GCQ7_BOTPV | UCRNP2_3893      | Yes | Yes | 61244 | Hydrolase |
| R1GBW7_BOTPV | UCRNP2_4217      | Yes | Yes | 41020 | Hydrolase |
| R1GAY7_BOTPV | UCRNP2_1025<br>9 | Yes | Yes | 60835 | Hydrolase |
| R1GAI1_BOTPV | UCRNP2_4714      | Yes | Yes | 34758 | Hydrolase |
| R1GAE5_BOTPV | UCRNP2_4781      | Yes | Yes | 61141 | Hydrolase |
| R1G9V6_BOTPV | UCRNP2_4913      | Yes | Yes | 38806 | Hydrolase |

|              |                  |     |     |        |           |
|--------------|------------------|-----|-----|--------|-----------|
| R1G9E1_BOTPV | UCRNP2_5072      | Yes | Yes | 47146  | Hydrolase |
| R1G8D0_BOTPV | UCRNP2_8897      | Yes | Yes | 25616  | Hydrolase |
| R1G8C1_BOTPV | UCRNP2_5439      | Yes | Yes | 39212  | Hydrolase |
| R1G7G3_BOTPV | UCRNP2_5817      | Yes | Yes | 44118  | Hydrolase |
| R1G776_BOTPV | UCRNP2_9363      | Yes | Yes | 60904  | Hydrolase |
| R1G6Y8_BOTPV | UCRNP2_9407      | Yes | Yes | 34374  | Hydrolase |
| R1G6D0_BOTPV | UCRNP2_9564      | Yes | Yes | 43070  | Hydrolase |
| R1G5Y4_BOTPV | UCRNP2_9853      | Yes | Yes | 56778  | Hydrolase |
| R1G5R2_BOTPV | UCRNP2_9781      | Yes | Yes | 31462  | Hydrolase |
| R1G0U7_BOTPV | UCRNP2_8284      | No  | Yes | 76268  | Hydrolase |
| R1FVA2_BOTPV | UCRNP2_1032<br>1 | Yes | Yes | 70539  | Hydrolase |
| R1FV38_BOTPV | UCRNP2_1035<br>2 | Yes | Yes | 62478  | Hydrolase |
| R1EYI5_BOTPV | UCRNP2_364       | Yes | Yes | 20173  | Hydrolase |
| R1EXV1_BOTPV | UCRNP2_612       | Yes | Yes | 88843  | Hydrolase |
| R1EXU8_BOTPV | UCRNP2_626       | Yes | Yes | 60373  | Hydrolase |
| R1EVA1_BOTPV | UCRNP2_1506      | Yes | Yes | 51365  | Hydrolase |
| R1EUP8_BOTPV | UCRNP2_1879      | Yes | Yes | 48877  | Hydrolase |
| R1EUG4_BOTPV | UCRNP2_1970      | Yes | Yes | 74938  | Hydrolase |
| R1EUD5_BOTPV | UCRNP2_1812      | Yes | Yes | 107169 | Hydrolase |
| R1EU52_BOTPV | UCRNP2_2106      | Yes | Yes | 51345  | Hydrolase |
| R1EQB5_BOTPV | UCRNP2_3458      | No  | Yes | 51200  | Hydrolase |
| R1EQ49_BOTPV | UCRNP2_3524      | Yes | Yes | 46705  | Hydrolase |
| R1EP88_BOTPV | UCRNP2_3629      | Yes | Yes | 84093  | Hydrolase |
| R1EKL4_BOTPV | UCRNP2_5185      | Yes | Yes | 57577  | Hydrolase |
| R1EJQ6_BOTPV | UCRNP2_5270      | Yes | Yes | 66967  | Hydrolase |
| R1EJE5_BOTPV | UCRNP2_5592      | Yes | Yes | 33879  | Hydrolase |
| R1EJ08_BOTPV | UCRNP2_5476      | Yes | Yes | 35296  | Hydrolase |
| R1EIF4_BOTPV | UCRNP2_5965      | Yes | Yes | 31915  | Hydrolase |
| R1EHV9_BOTPV | UCRNP2_5888      | Yes | Yes | 56459  | Hydrolase |
| R1EGV3_BOTPV | UCRNP2_6272      | Yes | Yes | 49745  | Hydrolase |
| R1EGF8_BOTPV | UCRNP2_6392      | No  | Yes | 67626  | Hydrolase |
| R1EFS2_BOTPV | UCRNP2_6649      | Yes | Yes | 57590  | Hydrolase |
| R1EFN6_BOTPV | UCRNP2_6948      | Yes | Yes | 85359  | Hydrolase |
| R1EFK4_BOTPV | UCRNP2_6745      | Yes | Yes | 32419  | Hydrolase |
| R1EF79_BOTPV | UCRNP2_7122      | Yes | Yes | 62810  | Hydrolase |
| R1EEC1_BOTPV | UCRNP2_7446      | Yes | Yes | 108544 | Hydrolase |
| R1EDI8_BOTPV | UCRNP2_7779      | Yes | Yes | 37269  | Hydrolase |
| R1EDH3_BOTPV | UCRNP2_7797      | Yes | Yes | 34892  | Hydrolase |
| R1EBK2_BOTPV | UCRNP2_8434      | Yes | Yes | 43902  | Hydrolase |
| R1EAR3_BOTPV | UCRNP2_8796      | Yes | Yes | 82417  | Hydrolase |
| R1EAH5_BOTPV | UCRNP2_8476      | No  | Yes | 44478  | Hydrolase |
| R1E6Y2_BOTPV | UCRNP2_1011<br>9 | Yes | Yes | 59873  | Hydrolase |
| R1E681_BOTPV | UCRNP2_1006<br>7 | Yes | Yes | 41350  | Hydrolase |
| R1E623_BOTPV | UCRNP2_1045<br>3 | Yes | Yes | 40346  | Hydrolase |

|              |                  |     |     |        |           |
|--------------|------------------|-----|-----|--------|-----------|
| R1E5V7_BOTPV | UCRNP2_1023<br>8 | Yes | Yes | 47907  | Hydrolase |
| R1H3Z2_BOTPV | UCRNP2_37        | Yes | No  | 53261  | Hydrolase |
| R1GVP5_BOTPV | UCRNP2_3045      | Yes | No  | 42418  | Hydrolase |
| R1GVK7_BOTPV | UCRNP2_3108      | Yes | No  | 61218  | Hydrolase |
| R1GU94_BOTPV | UCRNP2_3593      | Yes | No  | 49345  | Hydrolase |
| R1GT47_BOTPV | UCRNP2_3967      | Yes | No  | 37679  | Hydrolase |
| R1GP56_BOTPV | UCRNP2_3148      | Yes | No  | 58683  | Hydrolase |
| R1GMY2_BOTPV | UCRNP2_157       | Yes | No  | 62020  | Hydrolase |
| R1GMU2_BOTPV | UCRNP2_5929      | Yes | No  | 84731  | Hydrolase |
| R1GM11_BOTPV | UCRNP2_6259      | Yes | No  | 39070  | Hydrolase |
| R1GKX0_BOTPV | UCRNP2_862       | Yes | No  | 66019  | Hydrolase |
| R1GHJ3_BOTPV | UCRNP2_7843      | Yes | No  | 58112  | Hydrolase |
| R1GHG7_BOTPV | UCRNP2_7883      | Yes | No  | 60096  | Hydrolase |
| R1GHB2_BOTPV | UCRNP2_2217      | Yes | No  | 65346  | Hydrolase |
| R1GHA8_BOTPV | UCRNP2_5569      | Yes | No  | 91841  | Hydrolase |
| R1GG38_BOTPV | UCRNP2_2643      | Yes | No  | 81042  | Hydrolase |
| R1GEZ5_BOTPV | UCRNP2_3039      | Yes | No  | 47901  | Hydrolase |
| R1GD80_BOTPV | UCRNP2_3729      | Yes | No  | 34812  | Hydrolase |
| R1GCJ5_BOTPV | UCRNP2_7325      | Yes | No  | 39463  | Hydrolase |
| R1GC39_BOTPV | UCRNP2_4063      | Yes | No  | 39581  | Hydrolase |
| R1GBR8_BOTPV | UCRNP2_7651      | Yes | No  | 40706  | Hydrolase |
| R1GBC9_BOTPV | UCRNP2_4379      | Yes | No  | 63192  | Hydrolase |
| R1GB50_BOTPV | UCRNP2_1022<br>5 | Yes | No  | 54235  | Hydrolase |
| R1GAZ1_BOTPV | UCRNP2_1027<br>1 | Yes | No  | 73679  | Hydrolase |
| R1G8X2_BOTPV | UCRNP2_8676      | Yes | No  | 25831  | Hydrolase |
| R1G8H3_BOTPV | UCRNP2_5421      | Yes | No  | 171488 | Hydrolase |
| R1G7D0_BOTPV | UCRNP2_5851      | Yes | No  | 105043 | Hydrolase |
| R1G5D2_BOTPV | UCRNP2_6628      | Yes | No  | 45626  | Hydrolase |
| R1G324_BOTPV | UCRNP2_7463      | Yes | No  | 84322  | Hydrolase |
| R1G2T0_BOTPV | UCRNP2_7553      | Yes | No  | 48647  | Hydrolase |
| R1G0M1_BOTPV | UCRNP2_8337      | Yes | No  | 60702  | Hydrolase |
| R1FWJ1_BOTPV | UCRNP2_9839      | Yes | No  | 51950  | Hydrolase |
| R1EZX9_BOTPV | UCRNP2_13        | Yes | No  | 46166  | Hydrolase |
| R1EX46_BOTPV | UCRNP2_980       | Yes | No  | 54903  | Hydrolase |
| R1EWH5_BOTPV | UCRNP2_1261      | Yes | No  | 62216  | Hydrolase |
| R1EW80_BOTPV | UCRNP2_1160      | Yes | No  | 44814  | Hydrolase |
| R1EUA7_BOTPV | UCRNP2_1833      | Yes | No  | 56830  | Hydrolase |
| R1ET60_BOTPV | UCRNP2_2462      | Yes | No  | 42724  | Hydrolase |
| R1ERC6_BOTPV | UCRNP2_2876      | Yes | No  | 42927  | Hydrolase |
| R1EPE0_BOTPV | UCRNP2_3571      | Yes | No  | 97038  | Hydrolase |
| R1EP80_BOTPV | UCRNP2_3871      | Yes | No  | 86510  | Hydrolase |
| R1ENX6_BOTPV | UCRNP2_3973      | Yes | No  | 59291  | Hydrolase |
| R1EJ45_BOTPV | UCRNP2_5423      | Yes | No  | 64761  | Hydrolase |
| R1EGT1_BOTPV | UCRNP2_6531      | Yes | No  | 31092  | Hydrolase |
| R1ECV1_BOTPV | UCRNP2_7960      | Yes | No  | 87056  | Hydrolase |
| R1EBD7_BOTPV | UCRNP2_8492      | Yes | No  | 38070  | Hydrolase |



|              |                  |     |     |        |                          |
|--------------|------------------|-----|-----|--------|--------------------------|
| R1E9R3_BOTPV | UCRNP2_8802      | Yes | No  | 41490  | Hydrolase                |
| R1E9F8_BOTPV | UCRNP2_9287      | Yes | No  | 69955  | Hydrolase                |
| R1E8Z9_BOTPV | UCRNP2_9401      | Yes | No  | 123316 | Hydrolase                |
| R1E8S9_BOTPV | UCRNP2_9099      | Yes | No  | 55477  | Hydrolase                |
| R1E8B6_BOTPV | UCRNP2_9610      | Yes | No  | 45528  | Hydrolase                |
| R1E7W9_BOTPV | UCRNP2_9420      | Yes | No  | 108086 | Hydrolase                |
| R1E7V5_BOTPV | UCRNP2_9444      | Yes | No  | 61800  | Hydrolase                |
| R1E713_BOTPV | UCRNP2_1005<br>9 | Yes | No  | 48432  | Hydrolase                |
| R1E6N5_BOTPV | UCRNP2_1027<br>5 | Yes | No  | 46519  | Hydrolase                |
| R1GVC0_BOTPV | UCRNP2_3215      | Yes | Yes | 43748  | Isomerase                |
| R1GHN0_BOTPV | UCRNP2_5480      | Yes | Yes | 38083  | Isomerase                |
| R1GU70_BOTPV | UCRNP2_1378      | Yes | Yes | 42793  | Lyase                    |
| R1GN84_BOTPV | UCRNP2_3453      | No  | Yes | 25245  | Lyase                    |
| R1E934_BOTPV | UCRNP2_9371      | Yes | No  | 61924  | Lyase                    |
| R1H382_BOTPV | UCRNP2_317       | Yes | Yes | 75606  | Non enzymatic<br>protein |
| R1GSH0_BOTPV | UCRNP2_4276      | Yes | No  | 18262  | Non enzymatic<br>protein |
| R1GKT0_BOTPV | UCRNP2_4338      | Yes | Yes | 70839  | Non enzymatic<br>protein |
| R1GID5_BOTPV | UCRNP2_7520      | Yes | Yes | 57999  | Non enzymatic<br>protein |
| R1GIC8_BOTPV | UCRNP2_1786      | Yes | Yes | 16039  | Non enzymatic<br>protein |
| R1GHS9_BOTPV | UCRNP2_1979      | Yes | Yes | 35951  | Non enzymatic<br>protein |
| R1GF67_BOTPV | UCRNP2_8720      | Yes | No  | 43044  | Non enzymatic<br>protein |
| R1G8H7_BOTPV | UCRNP2_8856      | Yes | Yes | 27337  | Non enzymatic<br>protein |
| R1G7H5_BOTPV | UCRNP2_9267      | Yes | Yes | 38776  | Non enzymatic<br>protein |
| R1G676_BOTPV | UCRNP2_9627      | Yes | No  | 25673  | Non enzymatic<br>protein |
| R1G352_BOTPV | UCRNP2_7406      | Yes | Yes | 21962  | Non enzymatic<br>protein |
| R1G1Q3_BOTPV | UCRNP2_7919      | Yes | No  | 14190  | Non enzymatic<br>protein |
| R1FVG4_BOTPV | UCRNP2_1023<br>5 | Yes | Yes | 45325  | Non enzymatic<br>protein |
| R1EWZ5_BOTPV | UCRNP2_892       | Yes | Yes | 49696  | Non enzymatic<br>protein |
| R1ETS0_BOTPV | UCRNP2_2255      | Yes | Yes | 46920  | Non enzymatic<br>protein |
| R1EPB0_BOTPV | UCRNP2_3869      | Yes | No  | 18527  | Non enzymatic<br>protein |
| R1EIN7_BOTPV | UCRNP2_5605      | Yes | No  | 32793  | Non enzymatic<br>protein |

|              |                  |     |     |        |                       |
|--------------|------------------|-----|-----|--------|-----------------------|
| R1EGH3_BOTPV | UCRNP2_6648      | Yes | Yes | 76953  | Non enzymatic protein |
| R1EE60_BOTPV | UCRNP2_7269      | Yes | No  | 99248  | Non enzymatic protein |
| R1E9V1_BOTPV | UCRNP2_8743      | Yes | No  | 48901  | Non enzymatic protein |
| R1E8I6_BOTPV | UCRNP2_9221      | Yes | No  | 15362  | Non enzymatic protein |
| R1E6W1_BOTPV | UCRNP2_1015<br>7 | Yes | Yes | 15359  | Non enzymatic protein |
| R1E6C5_BOTPV | UCRNP2_1004<br>4 | Yes | No  | 36560  | Non enzymatic protein |
| R1G8U3_BOTPV | UCRNP2_8718      | No  | Yes | 106910 | Non enzymatic protein |
| R1EG56_BOTPV | UCRNP2_6496      | No  | Yes | 28362  | Non enzymatic protein |
| R1FV21_BOTPV | UCRNP2_1035<br>6 | Yes | Yes | 40357  | Non enzymatic protein |
| R1EZ07_BOTPV | UCRNP2_343       | Yes | Yes | 41037  | Non enzymatic protein |
| R1H3D6_BOTPV | UCRNP2_257       | Yes | No  | 62395  | Non enzymatic protein |
| R1GXL3_BOTPV | UCRNP2_2387      | Yes | No  | 58449  | Non enzymatic protein |
| R1GJC2_BOTPV | UCRNP2_7232      | Yes | No  | 81077  | Non enzymatic protein |
| R1GGV5_BOTPV | UCRNP2_8060      | Yes | No  | 63091  | Non enzymatic protein |
| R1G4B9_BOTPV | UCRNP2_1035<br>8 | Yes | No  | 63193  | Non enzymatic protein |
| R1G3P9_BOTPV | UCRNP2_7270      | Yes | No  | 60777  | Non enzymatic protein |
| R1FX65_BOTPV | UCRNP2_9580      | Yes | No  | 51931  | Non enzymatic protein |
| R1H3M7_BOTPV | UCRNP2_206       | Yes | Yes | 89115  | Oxidoreductase        |
| R1H231_BOTPV | UCRNP2_731       | Yes | Yes | 41115  | Oxidoreductase        |
| R1GQT1_BOTPV | UCRNP2_4898      | Yes | Yes | 38470  | Oxidoreductase        |
| R1GJT0_BOTPV | UCRNP2_7003      | Yes | Yes | 32232  | Oxidoreductase        |
| R1GB74_BOTPV | UCRNP2_1018<br>6 | Yes | Yes | 97034  | Oxidoreductase        |
| R1FVG2_BOTPV | UCRNP2_1024<br>2 | Yes | Yes | 63969  | Oxidoreductase        |
| R1ESA8_BOTPV | UCRNP2_2536      | Yes | Yes | 51681  | Oxidoreductase        |
| R1EKA6_BOTPV | UCRNP2_4996      | Yes | Yes | 64668  | Oxidoreductase        |
| R1EIT8_BOTPV | UCRNP2_5540      | Yes | Yes | 54791  | Oxidoreductase        |
| R1EGN1_BOTPV | UCRNP2_6594      | Yes | Yes | 60106  | Oxidoreductase        |
| R1EFL7_BOTPV | UCRNP2_6949      | Yes | Yes | 40563  | Oxidoreductase        |
| R1E7Q5_BOTPV | UCRNP2_9481      | Yes | Yes | 71393  | Oxidoreductase        |
| R1H000_BOTPV | UCRNP2_1480      | Yes | No  | 67920  | Oxidoreductase        |
| R1GWD3_BOTPV | UCRNP2_490       | Yes | No  | 78587  | Oxidoreductase        |

|              |              |     |     |       |                 |
|--------------|--------------|-----|-----|-------|-----------------|
| R1GT20_BOTPV | UCRNP2_1824  | Yes | No  | 58241 | Oxidoreductase  |
| R1GHB3_BOTPV | UCRNP2_5587  | Yes | No  | 87357 | Oxidoreductase  |
| R1GB06_BOTPV | UCRNP2_4485  | Yes | No  | 56308 | Oxidoreductase  |
| R1GAS7_BOTPV | UCRNP2_10354 | Yes | No  | 64354 | Oxidoreductase  |
| R1GAE2_BOTPV | UCRNP2_8121  | Yes | No  | 61247 | Oxidoreductase  |
| R1EF46_BOTPV | UCRNP2_6896  | Yes | No  | 46234 | Oxidoreductase  |
| R1EF40_BOTPV | UCRNP2_6897  | Yes | No  | 70583 | Oxidoreductase  |
| R1ED71_BOTPV | UCRNP2_7554  | Yes | No  | 70157 | Oxidoreductase  |
| R1EAK6_BOTPV | UCRNP2_8837  | Yes | No  | 30757 | Oxidoreductase  |
| R1GMD5_BOTPV | UCRNP2_3761  | Yes | No  | 35620 | Transferase     |
| R1GGJ5_BOTPV | UCRNP2_8221  | Yes | No  | 57479 | Transferase     |
| R1GAU0_BOTPV | UCRNP2_4537  | Yes | No  | 48367 | Transferase     |
| R1GRM4_BOTPV | UCRNP2_2362  | Yes | Yes | 22861 | Uncharacterized |
| R1GMX5_BOTPV | UCRNP2_3570  | Yes | Yes | 20526 | Uncharacterized |
| R1GLJ5_BOTPV | UCRNP2_6391  | Yes | Yes | 44361 | Uncharacterized |
| R1FZJ6_BOTPV | UCRNP2_8740  | Yes | Yes | 19798 | Uncharacterized |
| R1H157_BOTPV | UCRNP2_994   | Yes | No  | 22009 | Uncharacterized |
| R1GYB0_BOTPV | UCRNP2_2169  | Yes | No  | 22365 | Uncharacterized |
| R1GU06_BOTPV | UCRNP2_3690  | Yes | No  | 38129 | Uncharacterized |
| R1GL84_BOTPV | UCRNP2_761   | Yes | No  | 54276 | Uncharacterized |
| R1GK87_BOTPV | UCRNP2_6872  | Yes | No  | 58715 | Uncharacterized |
| R1GIN0_BOTPV | UCRNP2_7431  | Yes | No  | 29136 | Uncharacterized |
| R1G7F7_BOTPV | UCRNP2_9259  | Yes | No  | 26935 | Uncharacterized |
| R1G0W5_BOTPV | UCRNP2_8261  | Yes | No  | 29883 | Uncharacterized |
| R1G013_BOTPV | UCRNP2_8533  | Yes | No  | 39667 | Uncharacterized |
| R1FV17_BOTPV | UCRNP2_10381 | Yes | No  | 19147 | Uncharacterized |
| R1EXH8_BOTPV | UCRNP2_876   | Yes | No  | 32463 | Uncharacterized |
| R1EUX4_BOTPV | UCRNP2_1811  | Yes | No  | 13073 | Uncharacterized |
| R1EFP1_BOTPV | UCRNP2_6940  | Yes | No  | 13297 | Uncharacterized |
| R1EBX7_BOTPV | UCRNP2_7984  | Yes | No  | 42669 | Uncharacterized |

**Table S2.** *N. parvum* secreted proteins identified according to the culture medium (malt, malt with wood and both).

|                        | Malt | Malt + Wood | Both |
|------------------------|------|-------------|------|
| Hydrolases             | 54   | 7           | 97   |
| Isomerases             | 0    | 0           | 2    |
| Lyases                 | 1    | 1           | 1    |
| Oxidoreductases        | 11   | 0           | 12   |
| Transferases           | 3    | 0           | 0    |
| Ligases                | 0    | 0           | 0    |
| Uncharacterized        | 14   | 0           | 4    |
| Non-enzymatic proteins | 17   | 2           | 15   |

**Table S3.** List of *D. seriata* secreted proteins according to the culture medium.

| Entry Name | Gene Name | Found in <i>D. seriata</i> Malt | Found in <i>D. seriata</i> Malt+Wood | Molecular Weight | Enzyme Class |
|------------|-----------|---------------------------------|--------------------------------------|------------------|--------------|
|------------|-----------|---------------------------------|--------------------------------------|------------------|--------------|

|                  |                                  |     |     |        |                       |
|------------------|----------------------------------|-----|-----|--------|-----------------------|
| A0A0G2EU45_9PEZI | UCDDS831_g01842                  | No  | Yes | 23197  | Hydrolase             |
| A0A0G2G871_9PEZI | UCDDS831_g05153                  | No  | Yes | 81651  | Hydrolase             |
| A0A0G2DZL6_9PEZI | UCDDS831_g07378                  | No  | Yes | 90322  | Hydrolase             |
| A0A0G2EFN8_9PEZI | UCDDS831_g04332                  | No  | Yes | 22835  | Hydrolase             |
| A0A0G2GWI0_9PEZI | UCDDS831_g04419                  | Yes | No  | 62255  | Hydrolase             |
| A0A0G2G1W8_9PEZI | UCDDS831_g06213                  | No  | Yes | 131493 | Ligase                |
| A0A0G2E8U8_9PEZI | UCDDS831_g05366                  | Yes | Yes | 34301  | Non enzymatic protein |
| A0A0G2DVF8_9PEZI | BK809_0002194<br>UCDDS831_g08038 | No  | Yes | 14194  | Non enzymatic protein |
| A0A0G2GBY8_9PEZI | BK809_0002193<br>UCDDS831_g08039 | No  | Yes | 14884  | Non enzymatic protein |
| A0A0G2GFP8_9PEZI | UCDDS831_g03603                  | No  | Yes | 16968  | Non enzymatic protein |
| A0A0G2G3T6_9PEZI | BK809_0003196<br>UCDDS831_g05962 | No  | Yes | 20951  | Non enzymatic protein |
| A0A0G2GS40_9PEZI | UCDDS831_g05274                  | No  | Yes | 43206  | Non enzymatic protein |
| A0A0G2EVA1_9PEZI | BK809_0007516<br>UCDDS831_g01541 | No  | Yes | 36669  | Non enzymatic protein |
| A0A0G2ELD8_9PEZI | UCDDS831_g03391                  | No  | Yes | 38772  | Non enzymatic protein |
| A0A0G2GPT0_9PEZI | BK809_0000942<br>UCDDS831_g05765 | No  | Yes | 23769  | Non enzymatic protein |
| A0A0G2EVK6_9PEZI | BK809_0007423<br>UCDDS831_g01651 | No  | Yes | 59802  | Non enzymatic protein |
| A0A0G2F1Q4_9PEZI | UCDDS831_g00403                  | No  | Yes | 34541  | Non enzymatic protein |
| A0A0G2HK23_9PEZI | UCDDS831_g00085                  | No  | Yes | 55359  | Non enzymatic protein |
| A0A0G2G5D2_9PEZI | BK809_0003014<br>UCDDS831_g05610 | No  | Yes | 53928  | Oxidoreductase        |
| A0A0G2G355_9PEZI | UCDDS831_g06080                  | No  | Yes | 72503  | Oxidoreductase        |
| A0A0G2H0Y5_9PEZI | UCDDS831_g03635                  | No  | Yes | 48577  | Oxidoreductase        |
| A0A0G2EQU2_9PEZI | UCDDS831_g02257                  | No  | Yes | 36014  | Oxidoreductase        |
| A0A0G2GV48_9PEZI | UCDDS831_g04662                  | No  | Yes | 34432  | Oxidoreductase        |
| A0A0G2EAQ5_9PEZI | UCDDS831_g05258                  | No  | Yes | 65143  | Oxidoreductase        |
| A0A0G2DYL4_9PEZI | UCDDS831_g07336                  | Yes | Yes | 41616  | Transferase           |
| A0A0G2F325_9PEZI | UCDDS831_g00084                  | No  | Yes | 79876  | Transferase           |
| A0A0G2GYA2_9PEZI | BK809_0004243<br>UCDDS831_g00503 | No  | Yes | 16702  | Transferase           |

**Table S4.** *D. seriata* secreted proteins identified according to the culture medium (malt, malt with wood and both).

|                        | Malt | Malt + Wood | Both |
|------------------------|------|-------------|------|
| Hydrolases             | 1    | 4           | 0    |
| Isomerases             | 0    | 0           | 0    |
| Lyases                 | 0    | 0           | 0    |
| Oxidoreductases        | 0    | 6           | 0    |
| Transferases           | 0    | 2           | 1    |
| Ligases                | 0    | 1           | 0    |
| Uncharacterized        | 0    | 0           | 0    |
| Non-enzymatic proteins | 0    | 11          | 1    |

**Table S5.** List of compounds detected during trans-piceid, trans-resveratrol and trans-piceatannol metabolization.

| Feature Name | RT (min) | Molecular Formula                              | Monoisotopic Mass | Calculated [M - H] <sup>-</sup> m/z | Measured [M - H] <sup>-</sup> m/z | Δppm  | Base Peak            | Assigned Compound                           | λ max (nm)    | MS/MS Fragments <sup>a</sup>                                                  |
|--------------|----------|------------------------------------------------|-------------------|-------------------------------------|-----------------------------------|-------|----------------------|---------------------------------------------|---------------|-------------------------------------------------------------------------------|
| m_1          | 7.63     | C <sub>14</sub> H <sub>12</sub> O <sub>4</sub> | 244.07356         | 243.06628                           | 243.06346                         | 9.97  | [M - H] <sup>-</sup> | <sup>c</sup> piceatannol isomer             |               |                                                                               |
| m_2          | 10.06    |                                                |                   |                                     | 231.13226                         |       | [M - H] <sup>-</sup> |                                             |               |                                                                               |
| m_3          | 13.60    |                                                |                   |                                     | 243.16786                         |       | [M - H] <sup>-</sup> |                                             |               |                                                                               |
| m_4          | 13.99    | C <sub>28</sub> H <sub>24</sub> O <sub>7</sub> | 472.15220         | 471.14493                           | 471.14371                         | 2.59  | [M - H] <sup>-</sup> | <sup>a</sup> Leachianol G                   | 198, 232, 280 | 377.1014; 349.1410; 255.0857; 121.0374                                        |
| m_5          | 14.15    | C <sub>28</sub> H <sub>24</sub> O <sub>7</sub> | 472.15220         | 471.14493                           | 471.14418                         | 1.69  | [M - H] <sup>-</sup> | <sup>a</sup> Leachianol F                   | 196, 218      | 377.1043; 349.0979; 255.0857; 121.0386                                        |
| m_6          | 14.43    |                                                |                   |                                     | 243.16826                         |       | [M - H] <sup>-</sup> |                                             |               |                                                                               |
| m_7          | 14.54    | C <sub>28</sub> H <sub>24</sub> O <sub>7</sub> | 472.15220         | 471.14493                           | 471.14206                         | 5.87  | [M - H] <sup>-</sup> | <sup>b</sup> restrytisol A                  | 196, 217, 276 | 377.1047; 349.0982; 255.0857; 121.0384 @ 10 eV                                |
| m_8          | 14.97    |                                                |                   |                                     | 243.16776                         |       | [M - H] <sup>-</sup> |                                             | 192, 208      |                                                                               |
| m_9          | 15.82    |                                                |                   |                                     | 231.06266                         | 15.68 | [M - H] <sup>-</sup> |                                             |               |                                                                               |
| m_10         | 16.19    | C <sub>20</sub> H <sub>22</sub> O <sub>8</sub> | 390.13147         | 389.2419                            | 389.12196                         | 5.74  | [M - H] <sup>-</sup> | <sup>a</sup> trans-piceid                   | 198, 218, 312 |                                                                               |
| m_11         | 16.47    | C <sub>28</sub> H <sub>22</sub> O <sub>6</sub> | 454.14164         | 453.13436                           | 453.13436                         | 4.47  | [M - H] <sup>-</sup> | <sup>a</sup> pallidol                       | 202, 286      | 359.0923; 265.0582; 264.4424; 93.0423                                         |
| m_12         | 16.54    | C <sub>28</sub> H <sub>24</sub> O <sub>7</sub> | 472.15220         | 471.14493                           | 471.14727                         | 4.96  | [M - H] <sup>-</sup> | <sup>c</sup> oxidized resveratrol dimer     |               |                                                                               |
| m_13         | 16.69    | C <sub>28</sub> H <sub>24</sub> O <sub>7</sub> | 472.15220         | 471.14493                           | 471.14697                         | 4.32  | [M - H] <sup>-</sup> | <sup>c</sup> oxidized resveratrol dimer     |               |                                                                               |
| m_14         | 16.73    | C <sub>14</sub> H <sub>12</sub> O <sub>4</sub> | 244.07356         | 243.06628                           | 243.06656                         | 1.14  | [M - H] <sup>-</sup> | <sup>a</sup> trans-piceatannol              | 222, 322      | 201.0527; 199.0723; 175.0734; 173.0581; 172.0501; 159.0426; 135.0440; 41.0041 |
| m_15         | 16.96    | C <sub>29</sub> H <sub>26</sub> O <sub>7</sub> | 486.16785         | 485.16058                           | 485.15906                         | 3.13  | [M - H] <sup>-</sup> | <sup>c</sup> methoxylated resveratrol dimer |               |                                                                               |
| m_16         | 17.12    |                                                |                   |                                     | 231.06373                         | 11.05 | [M - H] <sup>-</sup> |                                             |               |                                                                               |
| m_17         | 17.60    | C <sub>28</sub> H <sub>22</sub> O <sub>8</sub> | 486.13147         | 485.12419                           | 485.12086                         | 6.87  | [M - H] <sup>-</sup> | <sup>c</sup> piceatannol dimer              |               |                                                                               |

|      |       |                                                |           |           |           |      |                      |                                            |               |                                                                                                         |
|------|-------|------------------------------------------------|-----------|-----------|-----------|------|----------------------|--------------------------------------------|---------------|---------------------------------------------------------------------------------------------------------|
| m_18 | 17.80 | C <sub>28</sub> H <sub>24</sub> O <sub>7</sub> | 472.15220 | 471.14493 | 471.14286 | 4.17 | [M - H] <sup>-</sup> | <sup>c</sup> oxidized<br>resveratrol dimer | 198, 218      |                                                                                                         |
| m_19 | 18.05 | C <sub>14</sub> H <sub>12</sub> O <sub>3</sub> | 228.07864 | 227.07137 | 227.07138 | 0.05 | [M - H] <sup>-</sup> | <sup>a</sup> trans-resveratrol             | 220, 306      | 164.9418; 119.0411;<br>109.4032                                                                         |
| m_20 | 19.69 | C <sub>28</sub> H <sub>22</sub> O <sub>8</sub> | 486.13147 | 485.12419 | 485.12126 | 6.05 | [M - H] <sup>-</sup> | <sup>b</sup> Cassigarol E                  | 198, 218      | 148.9555 ;<br>197.0615 ;<br>201.0560 ;<br>213.0555 ;<br>223.0441 ;<br>241.0534 ;<br>243.0696 ; 244.0733 |
| m_21 | 20.42 | C <sub>28</sub> H <sub>22</sub> O <sub>6</sub> | 454.14164 | 453.13436 | 453.13497 | 1.34 | [M - H] <sup>-</sup> | <sup>a</sup> trans- $\delta$ -viniferin    | 202, 222, 310 | 385.1347; 369.1079;<br>359.0865; 347.0872;<br>333.0713                                                  |
| m_22 | 20.43 |                                                |           |           | 231.11856 |      | [M - H] <sup>-</sup> |                                            |               |                                                                                                         |
| m_23 | 21.33 | C <sub>28</sub> H <sub>20</sub> O <sub>8</sub> | 484.11582 | 483.10854 | 483.10576 | 5.76 | [M - H] <sup>-</sup> | <sup>c</sup> piceatannol dimer             |               |                                                                                                         |

All MS/MS spectra were recorded at 25 eV otherwise the collision energy is specified after the symbol @. <sup>a</sup> indicates metabolites with confirmed identification by standard, <sup>b</sup> indicates putative annotation by MS/MS and UV, <sup>c</sup> indicates non-characterized metabolities.
